# Supplementary material for: Cognitive impairment and microvascular function in end‐stage renal disease
Source: PubMed Central journal article supplement — Int J Methods Psychiatr Res. 2022 Mar 15;31(2):e1909. doi: 10.1002/mpr.1909 (PMC9159686; doi:10.1002/mpr.1909), 2022-03-15
Supplement: MPR-31-e1909-s001.pdf [file MPR-31-e1909-s001.pdf]

## Supplementary Material

Supplementary Figure 1:

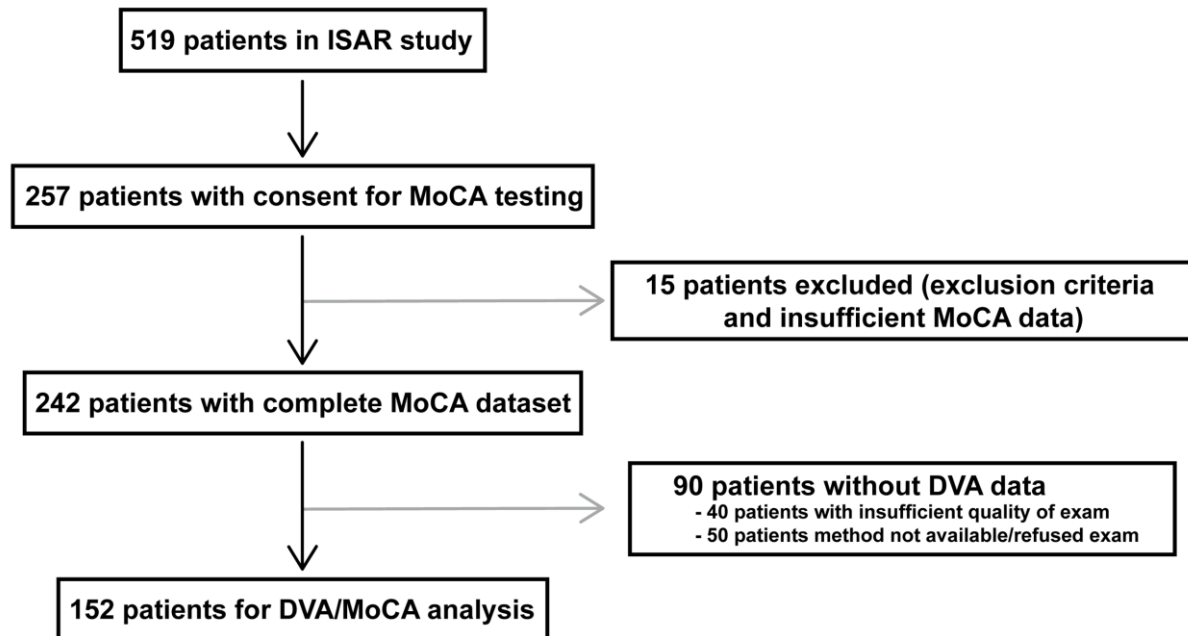

Figure legend:

Supplementary Figure 1: Flowchart – data acquisition process within the ISAR study

ISAR: rISk strAtification in end-stage renal disease, MoCA: Montreal Cognitive Assessment,

DVA: dynamic vessel analysis.

**Supplementary Table 1:** Comparison between included and excluded patients due to availability of DVA.

| <b>Demographics</b>                       | MoCA + DVA data<br>(n=152) | MoCA only (n=90)  | p-value      |
|-------------------------------------------|----------------------------|-------------------|--------------|
| Age (years), mean $\pm$ SD                | 64.16 $\pm$ 14.95          | 67.38 $\pm$ 15.32 | 0.112        |
| Sex m/f, n (%)                            | 106 (69.7)/46 (30.3)       | 67(74.4)/23(25.6) | 0.433        |
| Educational level $\leq$ 12 years, n (%)  | 96 (63.2)                  | 54 (60.0)         | 0.625        |
| <b>Comorbidities</b>                      |                            |                   |              |
| Arterial hypertension, n (%)              | 144 (94.7)                 | 85 (94.4)         | 0.922        |
| Diabetes mellitus, n (%)                  | 48 (31.6)                  | 45 (50.0)         | <b>0.004</b> |
| Hypercholesterolemia, n (%)               | 92 (60.5)                  | 67 (74.4)         | <b>0.027</b> |
| Nicotine abuse, n (%)                     | 30 (19.7)                  | 21 (23.3)         | 0.507        |
| BMI, mean $\pm$ SD                        | 25.92 $\pm$ 5.53           | 27.10 $\pm$ 5.63  | 0.092        |
| <b>MoCA parameters</b>                    |                            |                   |              |
| MoCA score, mean                          | 24.2 $\pm$ 3.9             | 22.9 $\pm$ 4.3    | <b>0.021</b> |
| Visuospatial Executive, mean <sup>†</sup> | 3.8                        | 3.4               | <b>0.004</b> |
| Naming, mean <sup>†</sup>                 | 2.9                        | 2.8               | <b>0.043</b> |
| Attention, mean <sup>†</sup>              | 5.4                        | 5.1               | <b>0.006</b> |
| Language, mean <sup>†</sup>               | 1.8                        | 1.7               | 0.441        |
| Abstraction, mean <sup>†</sup>            | 1.6                        | 1.6               | 0.535        |
| Memory, mean <sup>†</sup>                 | 2.7                        | 2.4               | 0.233        |
| Orientation, mean <sup>†</sup>            | 5.9                        | 5.8               | <b>0.042</b> |
| <b>Dialysis data</b>                      |                            |                   |              |
| Dialysis vintage (months), mean $\pm$     | 63.72 $\pm$ 63.97          | 62.28 $\pm$ 70.22 | 0.739        |
| Time on dialysis (hours), mean $\pm$ SD   | 4.55 $\pm$ 0.79            | 4.39 $\pm$ 0.64   | 0.126        |
| Ultrafiltration volume (liters), mean     | 2.29 $\pm$ 1.07            | 2.02 $\pm$ 1.18   | 0.132        |
| Kt/V, mean $\pm$ SD                       | 1.54 $\pm$ 0.38            | 1.50 $\pm$ 0.33   | 0.876        |

m/f: male/female, CVD: cardiovascular disease, ESRD: end stage renal disease, DVA: dynamic vessel analysis.

<sup>†</sup> Calculation of SD was not performed because of lack of normally distributed data. Data displayed as mean to illustrate slight differences.

Supplementary Table 2: DVA parameters and their correlation to demographical and clinical features

|                                                               | aMax             |              | vMax             |              |
|---------------------------------------------------------------|------------------|--------------|------------------|--------------|
|                                                               | rho <sup>†</sup> | p-value      | rho <sup>†</sup> | p-value      |
| <b>Demographics, comorbidities and hemodynamics</b>           |                  |              |                  |              |
| Age                                                           | -0.109           | 0.183        | <b>-0.209</b>    | <b>0.010</b> |
| Arterial hypertension                                         | <b>-0.169</b>    | <b>0.038</b> | -0.130           | 0.113        |
| Systolic arterial pressure, mmHg                              | 0.022            | 0.793        | 0.027            | 0.738        |
| Diastolic arterial pressure, mmHg                             | 0.111            | 0.175        | 0.073            | 0.370        |
| Mean arterial pressure, mmHg                                  | 0.078            | 0.338        | 0.054            | 0.509        |
| Diabetes mellitus                                             | -0.115           | 0.161        | -0.092           | 0.263        |
| Hypercholesterolemia                                          | -0.076           | 0.353        | -0.107           | 0.193        |
| Nicotine abuse                                                | -0.023           | 0.777        | 0.026            | 0.754        |
| BMI, kg/m <sup>2</sup>                                        | 0.016            | 0.842        | -0.038           | 0.641        |
| <b>Dialysis-specific data</b>                                 |                  |              |                  |              |
| Dialysis vintage (months on dialysis)                         | 0.025            | 0.763        | 0.009            | 0.914        |
| Ultrafiltration volume, liters                                | -0.080           | 0.344        | -0.036           | 0.671        |
| <b>Laboratory parameters</b>                                  |                  |              |                  |              |
| hsCRP, mg/dl                                                  | -0.037           | 0.655        | -0.111           | 0.180        |
| Serum calcium, mmol/l                                         | -0.095           | 0.248        | -0.027           | 0.741        |
| Serum phosphate, mmol/l                                       | -0.007           | 0.937        | -0.016           | 0.845        |
| Ca-PO <sub>4</sub> product, mmol <sup>2</sup> /l <sup>2</sup> | -0.048           | 0.555        | -0.026           | 0.751        |

† calculation with Spearman correlation, significant (p<0.05) correlations are marked bold.

BMI: Body mass index, hsCRP: high sensitivity C-reactive protein, Ca-PO<sub>4</sub>: Calcium phosphate
